# Supplementary material
Source: publisher figshare collection journal article supplement (https://acs.figshare.com/ndownloader/files/16797707)
Supplement: Supplementary file 1 [file 16797707]

## **Supporting Information**

### **Particulate Matter Exposure History Affects Antioxidant Defense Response of Mouse Lung to Haze Episodes**

Xuemei Liu,<sup>†,||</sup> Jinhua Wang,<sup>†</sup> Yifan Fan,<sup>†</sup> Yue Xu,<sup>†</sup> Mengxing Xie,<sup>†</sup> Yu Yuan,<sup>†</sup>  
Huiming Li,<sup>\*,‡</sup> and Xin Qian<sup>\*,†,§</sup>

<sup>†</sup>State Key Laboratory of Pollution Control and Resources Reuse, School of the Environment,  
Nanjing University, Nanjing 210023, P. R. China

<sup>‡</sup>School of Environment, Nanjing Normal University, Nanjing 210023, P. R. China

<sup>§</sup>Jiangsu Collaborative Innovation Center of Atmospheric Environment and Equipment Technology  
(CICAEET), Nanjing University of Information Science & Technology, Nanjing 210044, P. R.  
China

<sup>||</sup>Huaiyin Institute of Technology, School of Chemical Engineering, Huaian 223001, P. R. China

**A total of 13 pages, 6 tables, 3 figures**

## Table of Contents

Detailed structure and parameters of the filtration unit

Prevention of infectious diseases

PM<sub>2.5</sub> sampling and preparation

Analyses of trace metals (TM), polycyclic aromatic hydrocarbons (PAH) and persistent free radicals (PFR)

Biochemical tests for the levels of ROS and NO, as well as the activity of Sod and Cat

**Table S1.** Trace metal (TM) concentration in PM<sub>2.5</sub> samples during pre-exposure and haze-exposure and limit values of standards

**Table S2.** The concentrations of polycyclic aromatic hydrocarbons (PAHs) in PM<sub>2.5</sub> samples during pre-exposure and haze-exposure phases

**Table S3.** Sequences of the primers used in the quantitative reverse transcription polymerase chain reaction

**Table S4.** The levels of reactive oxygen species (ROS) and nitric oxide (NO) in the three groups of mice on pre-exposure termination (PE) and haze exposure termination (HE) , as well as first day (FA-1), third day (FA-3) and seventh day (FA-7) during the filtered-air phase

**Table S5** Relative mRNA expression levels of genes encoding the antioxidant enzymes superoxide dismutase 1–3 and catalase (*Sod1*, *Sod2*, *Sod3* and *Cat*), chaperones (*Hsp60*, *Hsp70* and *Hsp90*) and proteolytic systems (*Pmsb4*, *Pmsd8*, *P62* and *Beclin1*) in the three groups of mice on pre-exposure termination (PE) and haze exposure termination (HE), as well as first day (FA-1), third day (FA-3) and seventh day (FA-7) during the filtered-air phase

**Table S6.** Relative levels of mRNA expression of *P38*, *Nrf2* and *P21* in the three groups of mice on pre-exposure termination (PE) and haze exposure termination (HE)

**Figure S1.** Study area and the nearby industrial point sources of air pollutants.

**Figure S2.** Concentrations of SO<sub>2</sub>, NO<sub>2</sub>, CO and O<sub>3</sub> in the ambient air during the pre-exposure and haze exposure phases.

**Figure S3.** The morphological changes in the lungs of the three groups of mice on pre-exposure termination (PE) and haze exposure termination (HE). Hematoxylin-eosin staining, ×200. Black arrows label thickened alveolar walls, narrowed alveolar spaces. Green arrows and yellow arrows label infiltrates of macrophages and neutrophils, respectively. Red arrows label exudation of pink effusion in alveolar space.

### **Detailed structure and parameters of the filtration unit**

The filtration unit, composed of a HEPA filter (39cm×27cm×2 cm, IKIN HPF35M1120, China), pneumatic sensing system and a DustMate environmental monitor (Turnkey Instruments Ltd., U.K.), was installed between the air inlet and exposure area. When the filtration unit was off, the HEPA filter was beneath the air inlet, but when the filtration was switched on it rose and blocked the air inlet. The on/off state of the filtration unit was controlled either manually or by a pneumatic sensing system according to signals generated by the PM<sub>2.5</sub> concentration coming from a DustMate (Turnkey Instruments Ltd., U.K.). In the first chamber, the filtration unit was switched off, such that ambient air was provided during the entire pre-exposure phase (whole-air group). In the second chamber, the filtration unit was controlled automatically and was switched on only when the PM<sub>2.5</sub> concentration exceeded 75 µg/m<sup>3</sup> (Chinese 24-h Guideline for PM<sub>2.5</sub>). This ensured that mice in the second chamber were exposed only to ambient air with a low level of PM<sub>2.5</sub> pollution (low-PM group). In the third chamber, the filtration unit was switched on during the entire pre-exposure phase, such that the mice were exposed only to filtered, very clean air (filtered-air group). The HEPA filter had a particle removal capacity of at least 99.97% for particles with a diameter of 0.3 µm, thus including dust, smoke, pollen, pet dander and other allergens. A test run showed that no obvious differences of PM<sub>2.5</sub> concentrations were found in different positions of the same chamber. The PM<sub>2.5</sub> concentration differences between the unfiltered-air in the chamber and the ambient air were no more than 5 µg/m<sup>3</sup>.

### **Prevention of infectious diseases**

- (1) Three mice per cage was kept in order to keep a suitable feeding density to decrease the incidence of infections.
- (2) Drinking water and bedding materials were replaced per 2 ~ 3 days.
- (3) The cages, chambers and shed were all disinfected once a week with 1:5000 potassium permanganate solution.
- (4) Infected people were forbidden to contact with exposed mice.

### **PM<sub>2.5</sub> sampling and preparation**

The Chinese city of Nanjing covers an area of ~6600 km<sup>2</sup> and is located in a north subtropical monsoon climate zone. It has an annual mean temperature of 16 °C and a mean annual precipitation of 1106 mm. The prevailing wind normally blows from the southeast in summer and from the northwest in winter. Automobiles, electrical power production, electronics, petrochemical, and steel are its five main industries. PM<sub>2.5</sub> samples were collected from the Xianlin Campus of Nanjing University, which is located in the northern suburbs of Nanjing.

Each filter used in sample collection was conditioned for 48 h in a desiccator at 25 °C and 40% relative humidity before and after sampling. The filters were weighed using a microbalance (Mettler-Toledo, Greifensee,

Switzerland). Samples were collected throughout the day ( from 8 am in the morning to 8 am of the next morning) from December 9, 2017 to January 20, 2018.

#### **Analyses of trace metals (TM), polycyclic aromatic hydrocarbons (PAH) and persistent free radicals (PFR)**

**TM analyses.** Metal elements in PM<sub>2.5</sub> were digested using HF and reverse aqua regia (a mixture of HCl and HNO<sub>3</sub> in a 1:3 ratio) successively. The As, Cd, Co, Cr, Cu, Ni, Pb and V concentrations in the extracts were determined using inductively coupled plasma mass spectrometry (Elan 9000, PerkinElmer). Elemental concentrations are expressed as the volume-related concentrations (normalized by the volume of air sampled through the filters). Quality control was ensured by analyzing certified reference material SRM 1648a (urban particulate matter). Recovery was within  $\pm 10\%$  of the certified values for the studied elements. More details can be found in our previous studies.<sup>1,2</sup>

**PAH analysis.** After sampling, the filters were stored in a closed, dark chamber at  $-20\text{ }^{\circ}\text{C}$  and PAH were measured within 30 days after filter extraction in a Soxhlet extraction apparatus. The PAH concentrations were determined using a Thermo Trace GC ultra gas chromatograph in connection with a mass spectrometer detector (electron ionization mode and quadrupole analyzer) fitted with a fused silica capillary (30m $\times$ 0.25mm ID $\times$ 0.25  $\mu\text{m}$  df) working in simple ion monitoring mode according to the protocol provided by Thermo Scientific. Helium served as the carrier gas, supplied at a constant flow rate of 1 ml/min and the transfer line was heated to  $280\text{ }^{\circ}\text{C}$ . The column temperature was programmed as follows:  $40\text{ }^{\circ}\text{C}$  (held 2 min), increasing at a rate of  $10\text{ }^{\circ}\text{C}/\text{min}$  until  $320\text{ }^{\circ}\text{C}$  (held 5.5 min). The quantifications were performed using an internal standard method. The limits of detection were determined to be in the range of  $< 0.00007$  to  $< 0.00026\text{ }\mu\text{g}/\text{m}^3$ . Recovery efficiencies for the 16 kinds of PAHs ranged from 0.802 to 0.911, with an average values of 0.867.

**PFR analysis.** Two pieces (10 mm $\times$ 10 mm) were cut from the sample filters and then further cut into small pieces before they were placed in a glass centrifuge tube. The filter pieces were directly analyzed using an electron paramagnetic resonance (EPR) spectrometer (EMX-10/12, Bruker, Germany). The instrument and operating parameters were as follows: center field, 3484 G; microwave frequency, 9.77 GHz; microwave power, 0.63 mW; modulation frequency, 100 kHz; modulation amplitude, 1.0 G; sweep width, 200 G. Radical quantification was conducted by comparing the signal intensity of the C standard in the EPR spectrum. The results were expressed as the radical number of spins in the PM samples (spins/ $\text{m}^3$ ).

Biochemical tests for the levels of ROS and NO, as well as the activity of Sod and Cat

**The measurements of ROS.** ROS were assayed with the method of 2', 7'-dichloro-dihydrofluorescein diacetate (DCFH-DA) detection, which is the most commonly used and sensitive method for the detection of ROS in the cell.

Specifically, the harvested fresh lung tissues were soaked in a 9× volume of PBS and stored at 4 °C before completing the batch of sampling. Then all of the samples were prepared into single cell suspensions one-off finished by high throughput single cell suspension equipment (SM-12/24/64, Jingxin Institute, China). The single cell suspensions were incubated with 10 μM DCFH-DA for 30 min at 37 °C, then centrifuged at 1000 g for 10 min to collect the fluorescence labeled cells. After washed three times with PBS, the labeled single cell were suspended again with a 9× volume of PBS, and the fluorescence intensity were immediately measured using an automatic microplate reader (Multiskan FC, Thermo Fisher Scientific. U.S.A.) with maximum excitation and emission spectra of 495 and 529 nm, respectively. Each batch of the ROS detection was finished on the same day of sampling.

**The measurements of NO.** The production of nitric oxide (NO) were determined with the method of nitrate reductase, which indirectly evaluated the level of NO through measuring the contents of NO metabolite such as nitrate and nitrite. According to the instructions for the kit provided by manufacturer (Nanjing Jiancheng Bioengineering Institute, Nanjing, China), 5 ml tissue homogenate (10%) was incubated with 0.4 ml mixed reagent containing reagent 1 and reagent 2 (1:1) at 37 °C for 60 min. After adding 0.2 ml reagent 3 and 0.1 ml reagent 4, the mixed sample were rested for 40 min at room temperature, then centrifuged at 500 ~ 4000 r/min for 10 min. Another 0.6 ml chromogenic agent composed of reagent 5, reagent 6 and reagent 7 (2.5:1:1) were mixed with 0.8 ml supernatant and absorbance was determined with spectrophotometer (DR3900, HACH, U.S.A.) at 550 nm wavelengths and 50 mm optical path.

**The measurement of Sod activity.** The total Sod were determined using a Total Superoxide Dismutase Assay Kit (Nanjing Jiancheng Bioengineering Institute, China). According to the instructions for the kit provided by manufacturer (Nanjing Jiancheng Bioengineering Institute, Nanjing, China), 50 μl fresh tissue homogenate (0.5%) was incubated with a mixed reagents contained 0.1 ml reagent 1, 0.1 ml reagent 2, 0.1 ml reagent 3 and reagent 4 at 37 °C for 40 min, then added 2 ml chromogenic agent composed of reagent 5, reagent 6 and glacial acetic acid (3:3:2:1). Absorbance was determined with spectrophotometer (DR3900, HACH, U.S.A) at 550 nm wavelengths and 1cm optical path. Protein concentrations were determined using the Bradford reagent (CW biotech).

**The measurement of Cat activity.** The Cat activities in lung tissues were determined using a Catalase Assay Kit (Nanjing Jiancheng Bioengineering Institute, China). According to the instructions provided by manufacturer (Nanjing Jiancheng Bioengineering Institute, Nanjing, China), 50 μl fresh tissue homogenate (0.5%) was incubated with a mixed reagents contained 1ml reagent 1, 0.1 ml reagent 2 at 37 °C for 1 min, then added 1ml reagent 5 and 0.1 ml reagent 6. Absorbance was determined with spectrophotometer (DR3900, HACH, U.S.A.) at 405 nm wavelengths and 5 mm optical path. Protein concentrations were determined using Bradford reagent (CW biotech).

**Table S1.** Trace metal (TM) concentration in PM<sub>2.5</sub> samples during pre-exposure and haze-exposure and limits values of standards (ng/m<sup>3</sup>)

| TM | Pre-exposure |              | Haze-exposure |             | Limit of NAAQS<br>(GB3095-2012) | Limit of WHO air<br>quality guidelines |
|----|--------------|--------------|---------------|-------------|---------------------------------|----------------------------------------|
|    | Mean         | Range        | Mean          | Range       |                                 |                                        |
| Cu | 169.21       | 34.47-383.87 | 288.15        | 90.70-447.9 | /                               | /                                      |
| As | 7.291        | 1.078-21.69  | 14.77         | 13.78-16.66 | 6                               | 6.6                                    |
| Cd | 5.664        | 1.509-15.28  | 6.073         | 6.055-6.087 | 5                               | 5                                      |
| Co | 5.152        | 2.364-8.953  | 8.418         | 7.226-10.70 | /                               | /                                      |
| Cr | 63.10        | 38.82-108.5  | 83.41         | 79.93-86.21 | /                               | /                                      |
| Ni | 19.05        | 7.796-36.13  | 29.02         | 26.79-33.10 | /                               | 25                                     |
| Pb | 69.55        | 22.32-170.7  | 110.85        | 86.78-109.7 | 500                             | 500                                    |
| V  | 7.693        | 1.002-24.93  | 15.59         | 13.48-15.03 | /                               | 1000                                   |

**Table S2.** The concentrations of polycyclic aromatic hydrocarbons (PAHs) in PM<sub>2.5</sub> samples during pre-exposure and haze-exposure (ng/m<sup>3</sup>)

| PAHs                      | Pre-exposure |            | Haze-exposure |            | Detection limit |
|---------------------------|--------------|------------|---------------|------------|-----------------|
|                           | Mean         | Range      | Mean          | Range      |                 |
| NAP                       | ND           | ND         | ND            | ND         | 0.26            |
| ACPY                      | 0.153        | ND-10.11   | 0.67          | 0.407-0.92 | 0.13            |
| ACP                       | ND           | ND         | ND            | ND         | 0.13            |
| FLU                       | ND           | ND         | ND            | ND         | 0.13            |
| PHE                       | 0.29         | ND-0.66    | 1.68          | ND -2.63   | 0.14            |
| ANT                       | ND           | ND         | ND            | ND         | 0.10            |
| FLUA                      | 0.28         | ND-3.10    | 1.38          | ND-2.63    | 0.14            |
| PYR                       | 0.11         | ND-0.94    | 0.47          | 0.21-0.73  | 0.10            |
| BaA                       | 1.40         | 0.44-3.99  | 2.69          | 1.64-3.10  | 0.12            |
| CHR                       | 0.96         | 0.20-3.09  | 1.58          | 1.20-1.80  | 0.10            |
| BbF                       | 2.38         | ND -0.77   | 0.54          | 0.29-0.87  | 0.12            |
| BkF                       | 0.48         | 0.21-0.79  | 0.54          | 0.37-0.77  | 0.12            |
| BaP                       | 0.13         | ND-0.32    | 0.21          | 0.11-0.22  | 0.12            |
| InP                       | 0.93         | 0.44-3.99  | 1.49          | 1.05-2.19  | 0.07            |
| DahA                      | 0.48         | ND-1.71    | 1.36          | 1.14-1.47  | 0.13            |
| BghiP                     | 0.42         | ND-1.57    | 1.17          | 0.87-1.42  | 0.13            |
| Σ LMW-PAHs <sup>(1)</sup> | 1.04         | 0.21-4.76  | 3.99          | 0.78-2.81  | /               |
| Σ MMW-PAHs <sup>(2)</sup> | 2.48         | 1.07-9.67  | 4.75          | 4.62-6.20  | /               |
| Σ HMW-PAHs <sup>(3)</sup> | 4.80         | 0.81-5.64  | 5.31          | 3.48-4.93  | /               |
| Σ 16 PAHs                 | 8.32         | 3.47-20.39 | 14.05         | 8.37-15.80 | /               |

(1) Low molecular weight (LMW)- PAHs, included naphthalene (NAP), acenaphthylene (ACPY), acenaphthene (ACP), fluorine (FLU), phenanthrene (PHE), and anthracene (AMT).

(2) Medium molecular weight (MMW)-PAHs were fluoranthene (FLUA), pyrene (PYR), benzo[a]anthracene (BaA), and chrysene (CHR).

(3) The high molecular weight (HMW)-PAHs were the group of dibenzo [a,h] anthracene (DahA), benzo [b] fluoranthene (BbF), benzo [k] fluoranthene (BkF), benzo (a) pyrene (BaP), indeno [1,2,3,-cd] pyrene (INP), benzo [ghi] p erylene (Bghip).

**Table S3.** Sequences of the primers used in the quantitative reverse transcription polymerase chain reaction.

| mRNA           | Accession no.  | Nucleotide sequence (5'→3')                             | Size (bp) |
|----------------|----------------|---------------------------------------------------------|-----------|
| <i>Sod1</i>    | NM_011434.1    | F: ATGTGACTGCTGGAAAGGACG<br>R: CGCAATCCCAATCACTCCAC     | 200       |
| <i>Sod2</i>    | NM_013671.3    | F: TCCCAGACCTGCCTTACGACT<br>R: CCCTTAGGGCTCAGGTTTGTC    | 244       |
| <i>Sod3</i>    | NM_011435.3    | F: TTGTTCTACGGCTTGCTACTGG<br>R: AGCATCCACCTCCCTTCGTC    | 198       |
| <i>Cat</i>     | NM_009804.2    | F: TTCTTGTTCAAGTACCGAGGGA<br>R: CCCTGGTCGGTCTTGTAATGG   | 131       |
| <i>Hsp60</i>   | NM_001356512.1 | F: GTGGTGCAGTGTGTTGAGAAGA<br>R: GAAAGTTTAGCAAGTCGCTCGTT | 232       |
| <i>Hsp70</i>   | NM_010478.2    | F: CCGACAAGGAGGAGTTCGTG<br>R: ACAGTAATCGGTGCCCAAGC      | 249       |
| <i>Hsp90</i>   | NM_008302.3    | F: AGGCTATCCCATCACCTCTATT<br>R: GGCTTCTCCTCATCCTCCTTATC | 117       |
| <i>Pmsb4</i>   |                | F: CTCGGCCAGATGGTGATT<br>R: ACGGGCATCTCGGTAGTA          |           |
| <i>Pmsd8</i>   |                | F: CTGGCCCGTGACATACTGGA<br>R: TTCCGGCTTCTGCTGCTG        |           |
| <i>P62</i>     | NM_001290769.1 | F: CCTGTGGTGGGAACCTCGCTAT<br>R: TTGGGATCTTCTGGTGGAGCA   | 299       |
| <i>Beclin1</i> | NM_019584.3    | F: GCAGCAGTTCAAAGAAGAGGTG<br>R: TTTTGATGGAATAGGAGCCGC   | 122       |
| <i>Nrf2</i>    | NM_010902.3    | F: CTGGCTGATACTACCGCTGTTC<br>R: AGGTGGGATTTGAGTCTAAGGAG | 208       |
| <i>P38</i>     | NM_001168508.1 | F: GTGCCCCGAACGATACCAGAAC<br>R: TGAATTCCTCCAGTGACCTTGC  | 241       |
| <i>P21</i>     | NM_009429.3    | F: CAGCCATGACGAGCTGTTCT<br>R: CTTTCGGTACCTTCGCCCTC      | 168       |

**Table S4.** The levels of reactive oxygen species (ROS) and nitric oxide (NO) in the three groups of mice on pre-exposure termination (PE) and haze exposure termination (HE) , as well as first day (FA-1), third day (FA-3) and seventh day (FA-7) during the filtered-air phase

| Index | Groups             | Timepoints  |             |             |             |             |
|-------|--------------------|-------------|-------------|-------------|-------------|-------------|
|       |                    | PE          | HE          | FA-1        | FA-3        | FA-7        |
| ROS   | Whole-air group    | 1.000±0.058 | 1.575±0.044 | 1.037±0.162 | 0.764±0.158 | 1.001±0.093 |
|       | Low-PM group       | 0.994±0.071 | 2.885±0.045 | 1.892±0.064 | 1.283±0.051 | 0.896±0.088 |
|       | Filtered-air group | 0.466±0.179 | 2.738±0.048 | 2.914±0.051 | 2.039±0.077 | 1.274±0.081 |
| NO    | Whole-air group    | 1.400±0.105 | 1.333±0.121 | 1.098±0.122 | 1.144±0.167 | 1.077±0.225 |
|       | Low-PM group       | 1.146±0.116 | 1.472±0.270 | 2.235±0.212 | 1.707±0.181 | 1.309±0.159 |
|       | Filtered-air group | 1.074±0.077 | 0.985±0.145 | 1.239±0.054 | 2.234±0.172 | 2.788±0.327 |

**Table S5** Relative mRNA expression levels of genes encoding the antioxidant enzymes superoxide dismutase 1–3 and catalase (*Sod1*, *Sod2*, *Sod3* and *Cat*), chaperones (*Hsp60*, *Hsp70* and *Hsp90*) and proteolytic systems (*Pmsb4*, *Pmsd8*, *P62* and *Beclin1*) in the three groups of mice on pre-exposure termination (PE) and haze exposure termination (HE), as well as first day (FA-1), third day (FA-3) and seventh day (FA-7) during the filtered-air phase

| Index          | Groups             | Timepoints  |              |              |              |              |
|----------------|--------------------|-------------|--------------|--------------|--------------|--------------|
|                |                    | PE          | HE           | FA-1         | FA-3         | FA-7         |
| <i>Sod1</i>    | Whole-air group    | 1.000±0.101 | 1.209±0.243  | 1.145±0.206  | 1.250±0.161  | 1.031±0.235  |
|                | Low-PM group       | 1.868±0.184 | 5.124±0.538  | 7.989±0.748  | 3.744±0.177  | 1.584±0.205  |
|                | Filtered-air group | 2.550±0.157 | 5.154±0.638  | 1.990±0.485  | 4.227±0.380  | 10.094±0.789 |
| <i>Sod2</i>    | Whole-air group    | 1.000±0.215 | 5.019±0.783  | 1.470±0.532  | 2.377±0.668  | 1.773±0.338  |
|                | Low-PM group       | 4.545±0.372 | 8.675±0.572  | 11.532±1.139 | 4.629±0.629  | 3.621±0.263  |
|                | Filtered-air group | 6.453±0.422 | 14.807±1.213 | 4.182±1.048  | 13.565±1.179 | 23.021±1.089 |
| <i>Sod3</i>    | Whole-air group    | 1.000±0.117 | 3.840±0.142  | 1.065±0.194  | 1.369±0.231  | 0.996±0.158  |
|                | Low-PM group       | 1.616±0.225 | 4.782±0.579  | 8.517±0.301  | 3.172±0.497  | 1.524±0.179  |
|                | Filtered-air group | 4.825±0.181 | 9.892±0.807  | 1.204±0.479  | 5.326±0.699  | 14.418±1.188 |
| <i>Cat</i>     | Whole-air group    | 1.000±0.160 | 1.370±0.233  | 1.599±0.302  | 2.494±0.340  | 2.103±0.368  |
|                | Low-PM group       | 4.439±0.268 | 4.130±0.656  | 15.426±0.433 | 21.320±1.129 | 3.599±0.256  |
|                | Filtered-air group | 5.709±0.494 | 16.054±1.476 | 3.774±0.585  | 20.946±0.917 | 34.729±1.468 |
| <i>Hsp60</i>   | Whole-air group    | 1.001±0.136 | 0.982±0.180  | 0.980±0.205  | 0.936±0.209  | 0.882±0.167  |
|                | Low-PM group       | 1.030±0.130 | 2.343±0.251  | 3.441±0.514  | 1.304±0.138  | 1.070±0.144  |
|                | Filtered-air group | 1.237±0.063 | 1.599±0.211  | 1.005±0.112  | 1.222±0.272  | 1.572±0.308  |
| <i>Hsp70</i>   | Whole-air group    | 1.002±0.208 | 1.519±0.280  | 1.079±0.156  | 1.160±0.275  | 1.196±0.260  |
|                | Low-PM group       | 1.164±0.144 | 1.102±0.234  | 1.117±0.284  | 1.601±0.301  | 2.979±0.129  |
|                | Filtered-air group | 2.114±0.193 | 1.975±0.342  | 1.297±0.140  | 1.654±0.390  | 5.084±0.494  |
| <i>Hsp90</i>   | Whole-air group    | 1.000±0.152 | 5.549±0.284  | 0.931±0.339  | 1.389±0.369  | 1.116±0.374  |
|                | Low-PM group       | 1.467±0.232 | 5.827±0.764  | 8.026±0.349  | 6.038±0.714  | 1.496±0.259  |
|                | Filtered-air group | 3.303±0.267 | 4.947±0.725  | 2.285±0.416  | 4.919±0.987  | 11.042±0.737 |
| <i>Pmsb4</i>   | Whole-air group    | 1.000±0.216 | 0.897±0.223  | 1.471±0.130  | 2.302±0.229  | 1.436±0.131  |
|                | Low-PM group       | 4.311±0.149 | 3.957±0.837  | 11.184±1.310 | 9.550±0.684  | 3.200±0.233  |
|                | Filtered-air group | 3.539±0.231 | 11.186±1.206 | 2.513±0.443  | 10.860±1.018 | 24.700±1.697 |
| <i>Pmsd8</i>   | Whole-air group    | 1.003±0.153 | 0.589±0.254  | 1.108±0.235  | 1.714±0.204  | 1.318±0.201  |
|                | Low-PM group       | 4.533±0.293 | 4.348±0.632  | 16.187±0.300 | 7.381±0.803  | 2.720±0.318  |
|                | Filtered-air group | 5.221±0.237 | 8.299±0.863  | 1.771±0.381  | 10.111±0.991 | 20.377±1.293 |
| <i>P62</i>     | Whole-air group    | 1.000±0.162 | 1.968±0.354  | 1.071±0.188  | 1.353±0.257  | 1.242±0.180  |
|                | Low-PM group       | 2.353±0.173 | 4.617±0.492  | 6.143±0.699  | 7.418±0.712  | 2.162±0.116  |
|                | Filtered-air group | 2.439±0.155 | 5.373±0.750  | 1.705±0.344  | 9.703±1.085  | 17.623±1.275 |
| <i>Beclin1</i> | Whole-air group    | 1.000±0.182 | 2.939±0.316  | 0.971±0.254  | 1.367±0.436  | 0.932±0.347  |
|                | Low-PM group       | 1.780±0.165 | 4.571±0.438  | 7.467±0.608  | 5.444±0.558  | 1.360±0.315  |
|                | Filtered-air group | 3.025±0.183 | 4.053±0.258  | 1.212±0.119  | 5.225±0.829  | 11.247±0.925 |



**Table S6.** Relative levels of mRNA expression of *P38*, *Nrf2*, and *P21* in the three groups of mice on pre-exposure termination (PE) and haze exposure termination (HE)

| Groups             | <i>P38</i>  |             | <i>Nrf2</i> |             | <i>P21</i>  |             |
|--------------------|-------------|-------------|-------------|-------------|-------------|-------------|
|                    | PE          | HE          | PE          | HE          | PE          | HE          |
| Whole-air group    | 1.000±0.113 | 1.542±0.197 | 1.000±0.192 | 1.024±0.227 | 1.000±0.047 | 0.903±0.068 |
| Low-PM group       | 1.747±0.145 | 2.900±0.363 | 0.982±0.027 | 2.421±0.290 | 0.538±0.035 | 0.468±0.031 |
| Filtered-air group | 4.058±0.215 | 8.125±1.105 | 1.565±0.247 | 2.962±0.219 | 0.278±0.011 | 1.456±0.076 |

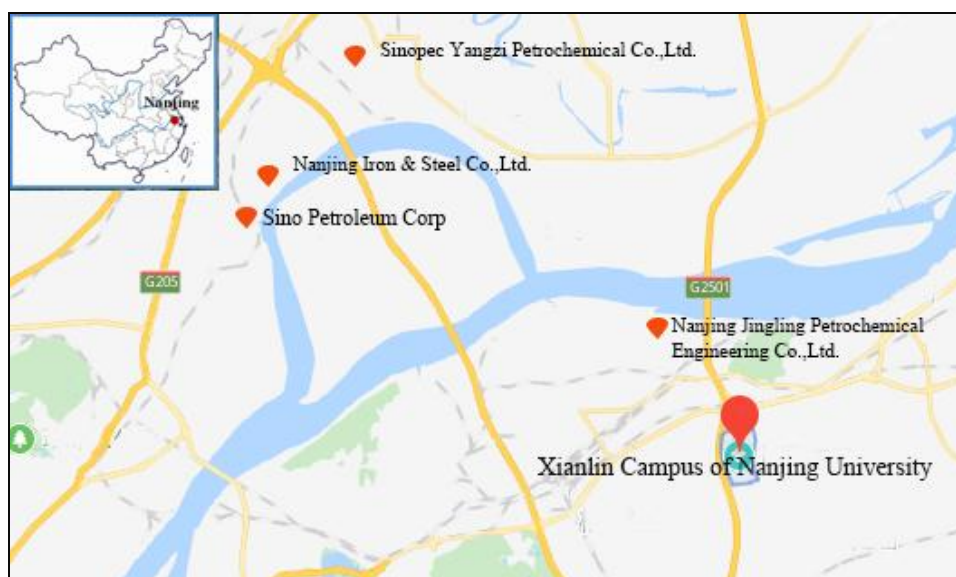

**Figure S1.** Study area and the nearby industrial point sources of air pollutants

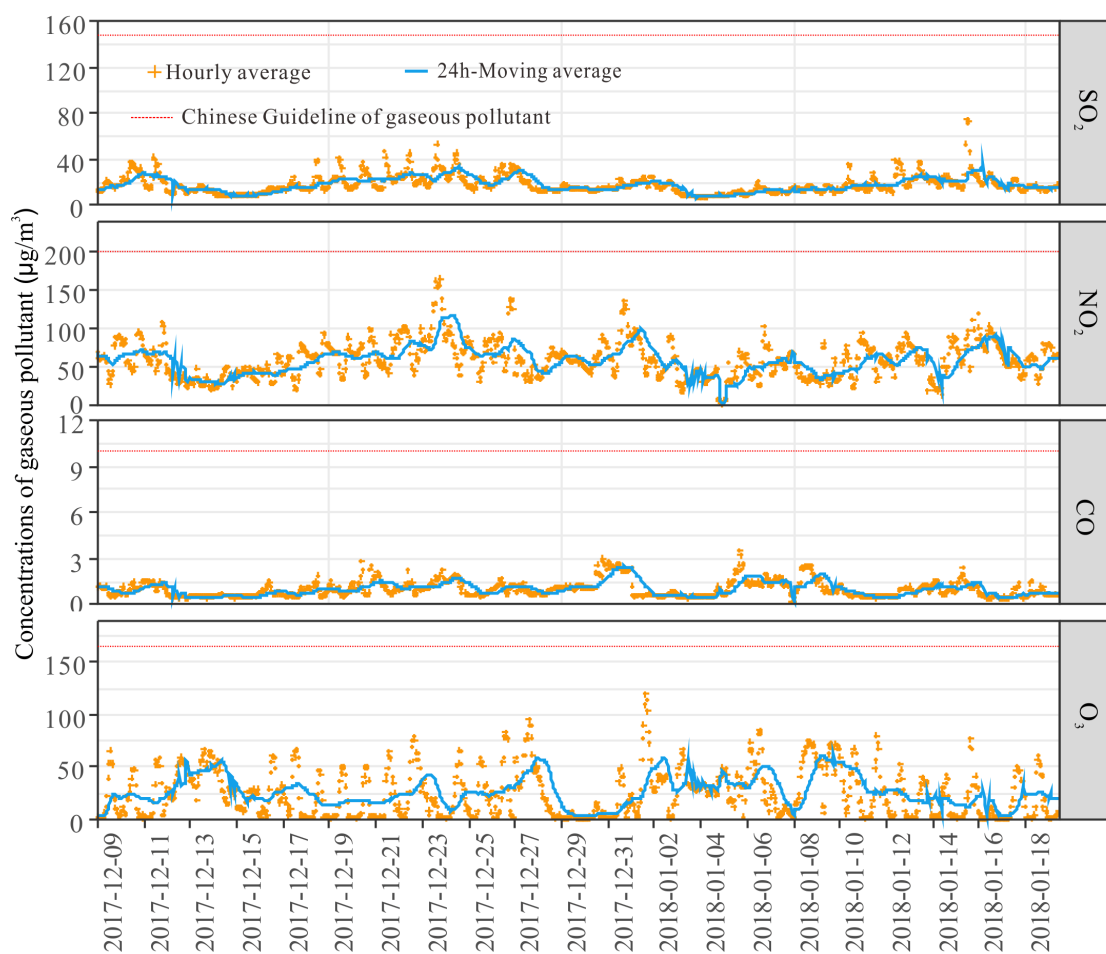

**Figure S2.** Concentrations of  $\text{SO}_2$ ,  $\text{NO}_2$ ,  $\text{CO}$  and  $\text{O}_3$  in the ambient air during the pre-exposure and haze exposure phases.

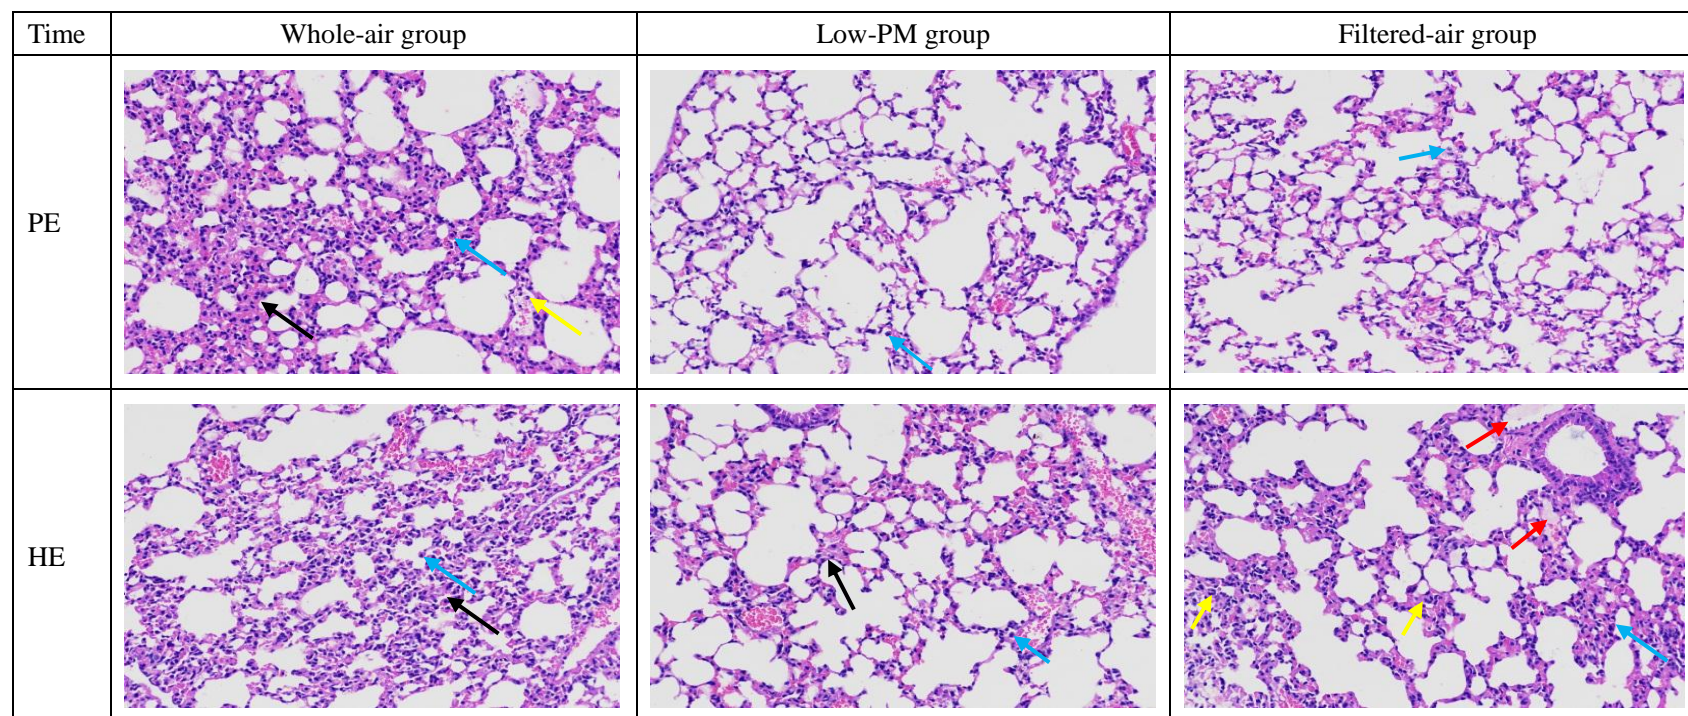

**Figure S3.** The morphological changes in the lungs of the three groups of mice on the termination of pre-exposure termination (PE) and haze exposure termination (HE). Hematoxylin-eosin staining,  $\times 200$ . Black arrows label thickened alveolar walls, narrowed alveolar spaces. Blue arrows and yellow arrows label infiltrates of macrophages and neutrophils, respectively. Red arrows label pink effusion in alveolar space.

## REFERENCES

(1) Li, H.; Wang, J.; Wang, Q. G.; Tian, C.; Qian, X.; Leng, X. Z. Magnetic Properties as a Proxy for Predicting Fine-Particle-Bound Heavy Metals in a Support Vector Machine Approach. *Environ. Sci. Technol.* **2017**, *51*(12), 6927-6935.

(2) Li, H.; Wang, Q.; Yang, M.; Li, F.; Wang, J.; Sun, Y.; Wang, C.; Wu, H.; Qian, X. Chemical characterization and source apportionment of PM<sub>2.5</sub> aerosols in a megacity of Southeast China. *Atmos. Res.* **2016**, *181*, 288-299.
